# Supplementary material
Source: PubMed Central journal article supplement (PMC2844406)

**Supplementary Figure S1. Expression of BMP6, BMP-receptors and SMADs within the Heidelberg/Montpellier-group 2.** Expression of (A1) BMP6, BMPR2, ACVR2A, (A2) BMPR1A, AVCR1, ACVR2B and (A3) SMAD1, SMAD4 and SMAD5 in normal plasma cells (BMPCs), memory B-cells (MBCs), polyclonal plasmablastic cells (PPCs), myeloma cells (MMCs) and human myeloma cell lines (HMCLs) within the Heidelberg/Montpellier-group 2 (HM2). For the HM1-group, see Figure 1. SMAD8 is neither expressed in HM1 nor HM2.

# Supplementary Figure S1.

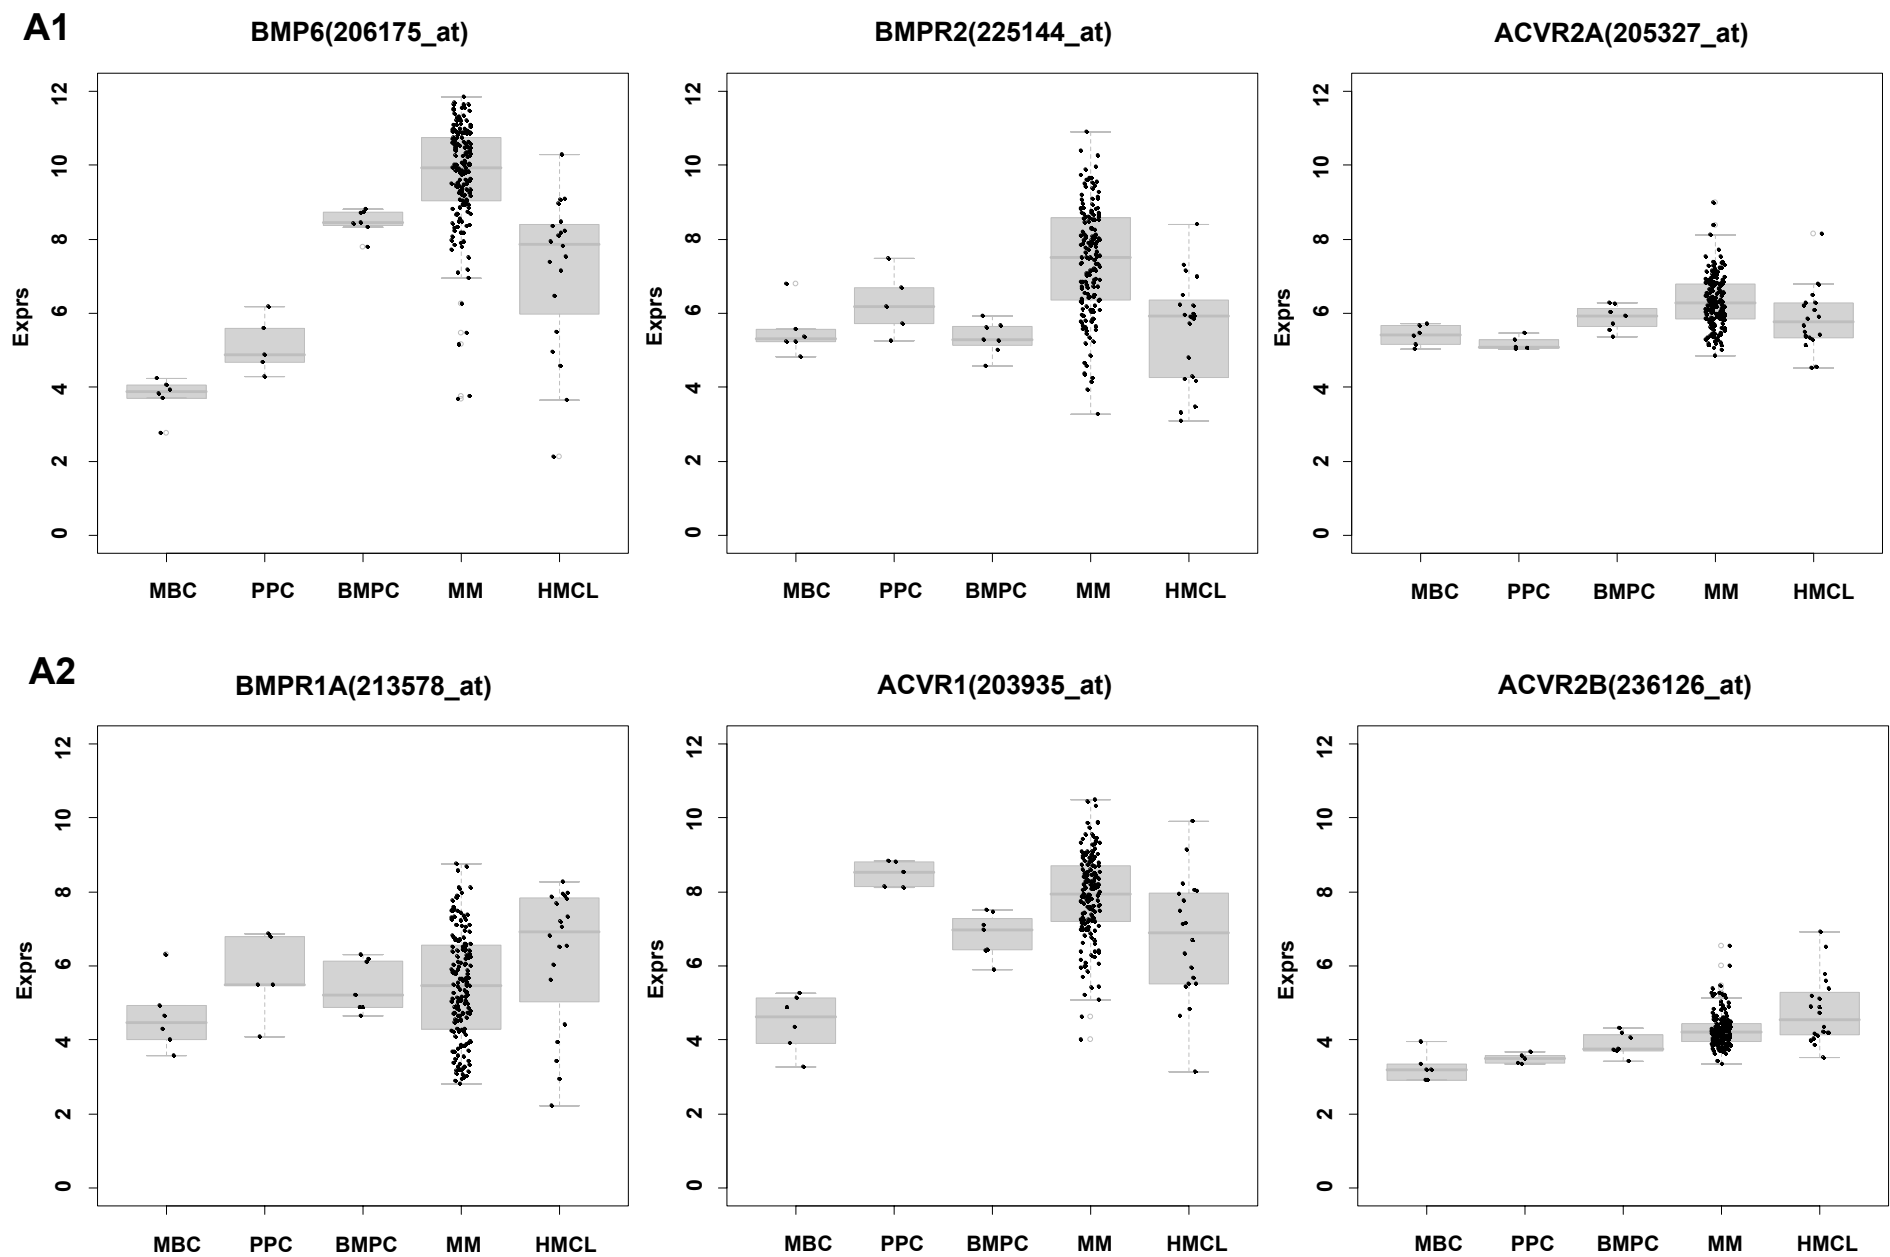

# Supplementary Figure S1.

**A3**

**SMAD1(210993\_s\_at)**

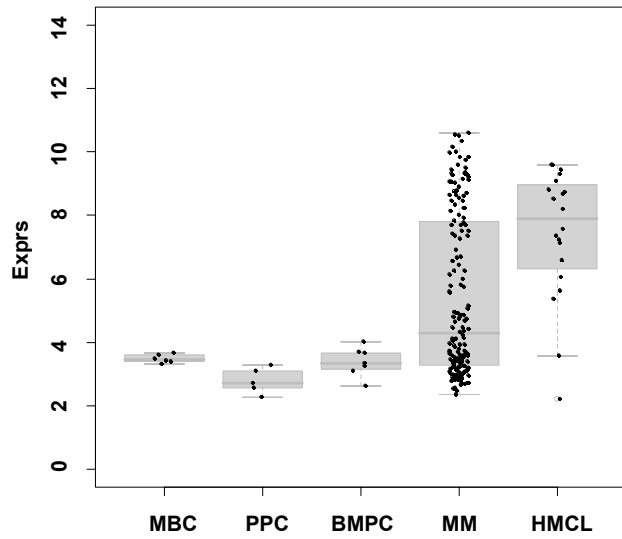

**SMAD4(202527\_s\_at)**

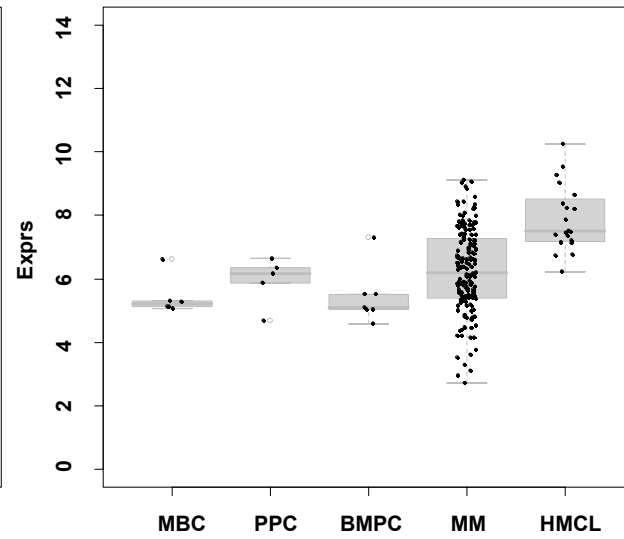

**SMAD5(225219\_s\_at)**

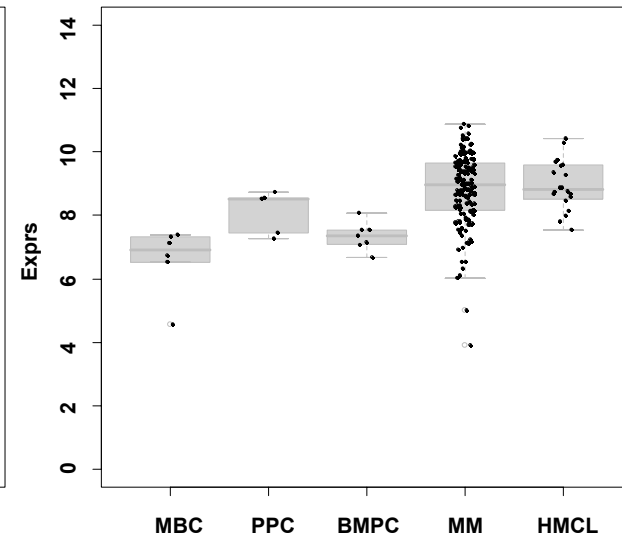

Supplement: halms437705-supplement_2.pdf [file halms437705-supplement_2.pdf]
