# Supplementary material
Source: PubMed Central journal article supplement (PMC2844406)
Supplement: halms437705-supplement_3.pdf [file halms437705-supplement_3.pdf]

# Supplementary Table S1. Differential gene expression.

**A**

| Gene Symbol | Probeset    | Exprs. BMPC | $\Delta$ MBC | $\Delta$ PPC | $\Delta$ MGUS | $\Delta$ MM | $\Delta$ HMCL | p-value MBC | p-value PPC | p-value MGUS | p-value MM | p-value HMCL |
|-------------|-------------|-------------|--------------|--------------|---------------|-------------|---------------|-------------|-------------|--------------|------------|--------------|
| BMP6        | 206176_at   | 8.59        | -5.25        | -4.28        | 0.82          | 0.64        | -1.92         | <0.001      | <0.001      | 0.37         | 0.37       | 0.001        |
| ACVR1       | 203935_at   | 6.1         | -0.96        | 0.51         | 0.38          | 1.2         | 0.42          | 0.29        | 0.62        | 0.63         | 0.03       | 0.62         |
| ACVR2A      | 205327_s_at | 7.8         | -0.53        | -0.57        | 0.33          | 0.12        | -0.6          | 0.09        | 0.07        | 0.37         | 0.63       | 0.01         |
| Gene Symbol | Probeset    | Exprs. BMPC | $\Delta$ MBC | $\Delta$ PPC | $\Delta$ MGUS | $\Delta$ MM | $\Delta$ HMCL | p-value MBC | p-value PPC | p-value MGUS | p-value MM | p-value HMCL |
| SMAD1       | 210993_s_at | 3.29        | -0.26        | -0.21        | 0.98          | 2.73        | 4.17          | 0.95        | 0.95        | 0.81         | 0.02       | 0.001        |
| SMAD4       | 202527_s_at | 4.41        | -0.03        | -0.3         | -0.21         | 0.03        | 1.05          | 0.95        | 0.81        | 0.85         | 0.95       | 0.02         |
| PTGS2       | 204748_at   | 5.7         | -2.11        | -2.21        | 2.59          | 1.76        | -2.4          | 0.15        | 0.14        | 0.09         | 0.12       | 0.05         |

**B**

| Gene Symbol | Probeset    | Exprs. BMPC | $\Delta$ MBC | $\Delta$ PPC | $\Delta$ MGUS | $\Delta$ MM | $\Delta$ HMCL | p-value MBC | p-value PPC | p-value MGUS | p-value MM | p-value HMCL |
|-------------|-------------|-------------|--------------|--------------|---------------|-------------|---------------|-------------|-------------|--------------|------------|--------------|
| BMP6        | 206176_at   | 8.47        | -4.71        | -3.35        | 1.24          | 1.26        | -1.28         | <0.001      | 0.001       | 0.27         | 0.07       | 0.11         |
| BMPR2       | 225144_at   | 5.33        | 0.17         | 0.93         | 2.1           | 2.08        | 0.24          | 0.94        | 0.37        | 0.06         | 0.001      | 0.9          |
| ACVR1       | 203935_at   | 6.83        | -2.36        | 1.66         | 0.1           | 1.05        | -0.1          | 0.002       | 0.07        | 0.94         | 0.07       | 0.94         |
| Gene Symbol | Probeset    | Exprs. BMPC | $\Delta$ MBC | $\Delta$ PPC | $\Delta$ MGUS | $\Delta$ MM | $\Delta$ HMCL | p-value MBC | p-value PPC | p-value MGUS | p-value MM | p-value HMCL |
| SMAD1       | 210993_s_at | 3.38        | 0.1          | -0.6         | 2.75          | 2.01        | 4.05          | 0.97        | 0.74        | 0.13         | 0.08       | 0.001        |
| SMAD4       | 202527_s_at | 5.44        | -0.03        | 0.5          | 0.33          | 0.82        | 2.45          | 0.97        | 0.62        | 0.74         | 0.2        | <0.001       |
| SAMD5       | 225219_at   | 7.34        | -0.73        | 0.76         | 0.63          | 1.49        | 1.61          | 0.35        | 0.35        | 0.42         | 0.003      | 0.004        |
| PTGS2       | 204748_at   | 4.82        | -1.65        | -2.28        | 3.88          | 2.74        | -1.85         | 0.39        | 0.28        | 0.05         | 0.04       | 0.24         |

**C**

| Gene Symbol | Probeset    | Exprs. ND-WBM | $\Delta$ MM-WBM | p-value MM-WBM |
|-------------|-------------|---------------|-----------------|----------------|
| BMP6        | 206176_at   | 2.73          | 3.18            | 0.003          |
| BMPR2       | 225144_at   | 3.86          | 1.36            | 0.01           |
| ACVR2A      | 205327_s_at | 3.07          | 1.11            | 0.01           |
| ACVR1       | 203935_at   | 3.19          | 1.08            | 0.02           |

**D**

| Gene Symbol | Probeset  | Exprs. MGUS+MMI | $\Delta$ MMII+MMIII | p-value MMII+MMIII |
|-------------|-----------|-----------------|---------------------|--------------------|
| BMPR2       | 225144_at | 5.3             | 0.95                | 0.007              |
| ACVR1       | 203935_at | 6.53            | 0.9                 | 0.007              |

**Supplementary Table S1. Differential gene expression for comparison of the respective populations of Table 1.** Differential gene expression as determined by EB-statistics using Benjamini-Hochberg correction for multiple testing for comparison of the respective populations of Table 1 for (A) Heidelberg/Montpellier-group 1 (HM1), (B) HM2, (C) whole bone marrow (WBM) and significant differential gene expression in early stage (MGUS/MMI) vs. advanced stage (MMII/MMIII) plasma cell dyscrasias. (D) Significant differences could only be found for HM1.
