# Supplementary material
Source: PubMed Central journal article supplement (PMC2844406)
Supplement: halms437705-supplement_4.pdf [file halms437705-supplement_4.pdf]

## Supplementary Table S2. Presence of expression of different BMPs.

| Gene Symbol | Probeset    | MBC present [%] | PPC present [%] | BMPC present [%] | MGUS present [%] | MM present [%] | HMCL present [%] | B                  |                    |
|-------------|-------------|-----------------|-----------------|------------------|------------------|----------------|------------------|--------------------|--------------------|
|             |             | (n=13)          | (n=12)          | (n=14)           | (n=12)           | (n=233)        | (n=40)           | ND-WBM present [%] | MM-WBM present [%] |
|             |             | (n=7)           | (n=57)          |                  |                  |                |                  |                    |                    |
| BMP1        | 202701_at   | 0.0             | 0.0             | 21.4             | 16.7             | 3.0            | 15.0             | 0.0                | 7.0                |
| BMP2        | 205290_s_at | 0.0             | 0.0             | 0.0              | 0.0              | 1.3            | 2.5              | 71.4               | 45.6               |
| BMP4        | 211518_s_at | 0.0             | 0.0             | 0.0              | 0.0              | 13.7           | 2.5              | 0.0                | 5.3                |
| BMP5        | 205431_s_at | 0.0             | 0.0             | 0.0              | 0.0              | 0.0            | 22.5             | 0.0                | 0.0                |
| BMP6        | 206176_at   | 0.0             | 16.7            | 92.9             | 100.0            | 97.9           | 85.0             | 0.0                | 70.2               |
| BMP7        | 209591_s_at | 0.0             | 0.0             | 0.0              | 0.0              | 0.0            | 7.5              | 85.7               | 66.7               |
| BMP8A       | 220203_at   | 0.0             | 0.0             | 0.0              | 0.0              | 0.9            | 5.0              | 0.0                | 0.0                |
| BMP8B       | 207865_s_at | 0.0             | 8.3             | 0.0              | 0.0              | 21.0           | 30.0             | 0.0                | 7.0                |
| BMP9        | 221136_at   | 0.0             | 16.7            | 0.0              | 8.3              | 2.1            | 12.5             | 0.0                | 7.0                |
| BMP11       | 216860_s_at | 0.0             | 0.0             | 0.0              | 0.0              | 0.9            | 0.0              | 0.0                | 3.5                |
| BMP14       | 206614_at   | 0.0             | 0.0             | 0.0              | 0.0              | 0.0            | 0.0              | 0.0                | 0.0                |

  

| Gene Symbol | Probeset    | CD3 present [%] | CD14 present [%] | CD15 present [%] | CD34 present [%] | MSC-ND present [%] | MSC-MM present [%] | OC present [%] |
|-------------|-------------|-----------------|------------------|------------------|------------------|--------------------|--------------------|----------------|
|             |             | (n=5)           | (n=5)            | (n=5)            | (n=5)            | (n=7)              | (n=7)              | (n=7)          |
| BMP1        | 202701_at   | 0.0             | 0.0              | 0.0              | 20.0             | 100.0              | 100.0              | 14.3           |
| BMP2        | 205290_s_at | 0.0             | 0.0              | 80.0             | 0.0              | 0.0                | 0.0                | 0.0            |
| BMP4        | 211518_s_at | 0.0             | 0.0              | 0.0              | 0.0              | 28.6               | 14.3               | 0.0            |
| BMP5        | 205431_s_at | 0.0             | 0.0              | 0.0              | 0.0              | 0.0                | 0.0                | 0.0            |
| BMP6        | 206176_at   | 0.0             | 0.0              | 0.0              | 0.0              | 28.6               | 28.6               | 0.0            |
| BMP7        | 209591_s_at | 0.0             | 0.0              | 0.0              | 0.0              | 0.0                | 0.0                | 0.0            |
| BMP8A       | 220203_at   | 0.0             | 0.0              | 0.0              | 0.0              | 0.0                | 0.0                | 0.0            |
| BMP8B       | 207865_s_at | 0.0             | 0.0              | 0.0              | 0.0              | 0.0                | 0.0                | 0.0            |
| BMP9        | 221136_at   | 0.0             | 0.0              | 0.0              | 0.0              | 0.0                | 0.0                | 0.0            |
| BMP11       | 216860_s_at | 20.0            | 0.0              | 0.0              | 0.0              | 0.0                | 0.0                | 0.0            |
| BMP14       | 206614_at   | 0.0             | 0.0              | 0.0              | 0.0              | 85.7               | 85.7               | 0.0            |

**Supplementary Table S2. Presence of expression of different BMPs as judged by PANP** in (A) memory B-cells (MBC), polyclonal plasmablastic cells (PPC), bone marrow plasma cells (BMPC), myeloma cells (MM) and human myeloma cell lines (HMCL), (B) the whole bone marrow of normal donors (ND-WBM), myeloma patients (MM-WBM), and (C) sub-fractions of the latter, respectively. \* As absence and presence of gene expression by PANP can only be assessed for U133A and U133 2.0 plus arrays, for probesets located on the U133B chip presented data are based on Heidelberg/Montpellier-group 2 only.
