# Supplementary material
Source: PubMed Central journal article supplement (PMC2844406)
Supplement: halms437705-supplement_5.pdf [file halms437705-supplement_5.pdf]

## Supplementary Table S3. Clinical patient data.

| Characteristic                    | HM1<br>n=48     | HM2<br>n=120   | LR<br>n=345    |
|-----------------------------------|-----------------|----------------|----------------|
| Age                               | 58,5 [37-72]    | 56 [35-73]     | 57 [25-77]     |
| Monoclonal protein                |                 |                |                |
| IgG                               | 25              | 69             | 193            |
| IgA                               | 11              | 29             | 93             |
| Bence Jones                       | 10              | 19             | 47             |
| Asecretory                        | 2               | 2              | 6              |
| IgD                               | 0               | 1              | 3              |
| NA                                | 0               | 0              | 3              |
| Myeloma in Durie and Salmon stage |                 |                |                |
| I                                 | 4               | 9              | NA             |
| II                                | 5               | 22             | NA             |
| III                               | 39              | 89             | NA             |
| Myeloma in ISS stage              |                 |                |                |
| I                                 | 15              | 55             | 189            |
| II                                | 26              | 39             | 86             |
| III                               | 7               | 23             | 70             |
| NA                                | 0               | 3              | 0              |
| Serum- $\beta$ 2-microglobulin    | 3.55 [1.3-11.9] | 3.1 [1.5-53.6] | 2.9 [1.0-38.7] |
| Plasma cells in bone marrow       | 45 [5-100]      | 40 [1-100]     | 42 [4-98]      |

**Supplementary Table S3. Clinical patient data for age, serum- $\beta$ 2-microglobulin, and plasma cell infiltration** in the Heidelberg/Montpellier-group 1 (HM1), 2 (HM2) and the Little Rock (LR)-data. Median value and range are given. NA, not available. ISS, International Staging System.
