# Supplementary material
Source: PubMed Central journal article supplement (PMC2844406)
Supplement: halms437705-supplement_6.pdf [file halms437705-supplement_6.pdf]

Supplementary Table S4. Patient populations, subpopulations and samples used.

| Analysis          |                   | Details    |                   |             | n          |     |            |
|-------------------|-------------------|------------|-------------------|-------------|------------|-----|------------|
| GEP               | MMC               | HM-group   | HM1 U133A+B       |             | 65         |     |            |
|                   |                   |            | HM2 U133 Plus 2.0 |             | 168        |     |            |
|                   |                   |            | WBM U133 Plus 2.0 |             | 57         |     |            |
|                   |                   |            |                   |             | <b>290</b> |     |            |
|                   |                   | LR-group   | U133 Plus 2.0     |             | <b>345</b> |     |            |
|                   | other populations | HM-group   |                   | HM1 U133A+B | MBC        | 7   |            |
|                   |                   |            |                   |             | PPC        | 7   |            |
|                   |                   |            |                   |             | BMPC       | 7   |            |
|                   |                   |            |                   |             | MGUS       | 7   |            |
|                   |                   |            |                   |             | HMCL       | 20  |            |
|                   |                   |            |                   |             | <b>48</b>  |     |            |
| MBC               |                   |            |                   |             | 6          |     |            |
| PPC               |                   |            |                   |             | 5          |     |            |
| BMPC              |                   |            |                   |             | 7          |     |            |
| MGUS              |                   |            |                   |             | 5          |     |            |
| HMCL              | 20                |            |                   |             |            |     |            |
| OC                | 7                 |            |                   |             |            |     |            |
| HM2 U133 Plus 2.0 | MSC               | 19         |                   |             |            |     |            |
|                   | CD3               | 5          |                   |             |            |     |            |
|                   | CD14              | 5          |                   |             |            |     |            |
|                   | CD15              | 5          |                   |             |            |     |            |
|                   | CD34              | 5          |                   |             |            |     |            |
|                   | WBM-ND            | 7          |                   |             |            |     |            |
|                   |                   | <b>96</b>  |                   |             |            |     |            |
|                   |                   | <b>779</b> |                   |             |            |     |            |
| Survival (HDT)    | MMC               | HM-group   | HM1               |             | 48         |     |            |
|                   |                   |            | HM2               |             | 120        |     |            |
|                   |                   |            | LR-group          |             | 345        |     |            |
|                   |                   |            |                   | <b>513</b>  |            |     |            |
| iFISH             | MMC               | HM-group   |                   | HM1         | HM2        |     |            |
|                   |                   |            |                   | t(4;14)     | 65         | 104 | <b>169</b> |
|                   |                   |            |                   | t(11;14)    | 65         | 106 | <b>171</b> |
|                   |                   |            |                   | 11q13       | 56         | 106 | <b>162</b> |
|                   |                   |            |                   | 1q21        | 53         | 100 | <b>153</b> |
|                   |                   |            |                   | 17p         | 58         | 105 | <b>163</b> |
|                   |                   |            |                   | 13q14       | 65         | 108 | <b>173</b> |
|                   |                   |            |                   | 9q34        | 44         | 58  | <b>102</b> |
|                   |                   |            |                   | 15q22       | 46         | 62  | <b>108</b> |
|                   |                   |            |                   | 19q13       | 46         | 73  | <b>119</b> |
| 22q11             | 45                | 48         | <b>93</b>         |             |            |     |            |

Supplementary Table S4. Patient populations, subpopulations and samples used. Heidelberg/Montpellier-group 1 (HM1), 2 (HM2) and the Little Rock (LR)-group.
